# Supplementary material
Source: publisher figshare collection journal article supplement (https://sage.figshare.com/ndownloader/files/16258922)
Supplement: Supplementary file 1 [file 16258922]

## Appendix B: Coding Manual

Results from the article coding were recorded using spreadsheet software. The column below indicates the place in which the data were recorded.

### Coding Descriptions and Instructions

- Column A: Study author and date
- Column B: Study number
- Column C: Name of the case
- Column D: Case number
- Column E: Figure the data was collected from
- Column F: Session (the x-variable) from 0 to the end of the experiment, increasing by 1
  - Each session increases by one, regardless of whether observations were collected every other day, or if there was more than one day between each observation).
- Column G: Outcome “Y”
  - That is the outcome score (or Y value) extracted using WebPlotDigitizer.
- Column H: Time (0 to the end of the intervention)
- Column I: D – Phase
  - 0 = baseline
  - 1 = treatment
- Column J: Dt – Phase \* Time
- Columns K – V: Indicate the phase a measure belongs to using dummy coded variables.
  - Multiple-baseline designs: Only need A1B1 column: 0 if a measurement belongs to the baseline, 1 for the treatment.
  - Reversal designs: If a measurement belongs to the first baseline, then assign 0 to A1B1, otherwise 1. If a measurement belongs to the first baseline or the first treatment, then assign 0 to B1A2, otherwise 1. If a measurement belongs to the second baseline then assign 0 to A2B2, otherwise 1 (the number of dummy variables depends on the number of phases).
  - Alternating Treatment Designs: Columns A1B1 and A1B2 are used. If a measure belong to the baseline, then assign 0 to both A1B1 and A1B2. If a measure belongs to the first treatment, then assign 1 to A1B1 and 0 to A1B2. If a measure belongs to the second treatment, then assign 0 to A1B1 and 1 to A1B2
- Column W: SCED Design: 1 = MBD, 2 = Reversal, 3 = ATD, 4 = Mixed
- Column X: Type\_Outcome: 1 = academic performance, 2 = social-behavioral outcomes (e.g., social skills, social interactions, on-task behavior, academic engagement).
- Column Y: Disability category:
  - 1 = At-Risk/Low Achievement
  - 2 = Autism Spectrum Disorders

- 3 = Behavioral Disorders (i.e., ADHD, OHI, psychiatric disorders, severe emotional disturbance, emotional or behavioral disabilities, emotional disturbance).
  - 4 = Deaf
  - 5 = Intellectual Disabilities (includes cognitive disabilities, MR, medical conditions with resulting cognitive impairments)
  - 6 = Learning Disabilities (includes students identified as having a learning disability, not students at-risk for learning disabilities or with low achievement)
- Column Z: Quality: The What Works Clearinghouse Single-Case Design Technical Documentation was used to assign a numerical value to the study quality (see Kratochwill et al., 2010, pp. 12-16).
  - 0 = does not meet WWC standards
  - 1 = meets WWC standards with reservations
  - 2 = meets WWC standards
- Column AB: Age
- Column AC: Tutor Age
- Column AD: Gender
  - 0 = Female
  - 1 = Male
- Column AE: Tutor Gender
  - 1 = Male
  - 2 = Female
- Column AF: Year of study
- Column AG: Increase: Indicates whether the intervention was designed to increase or decrease the dependent variable.
  - 0 = decrease
  - 1 = increase
- Column AH: Effect size used (List the effect size or sizes used by the authors of the original study to quantify the intervention effects. If none were used, leave this column blank).
